# Supplementary material for: Crystal structure of vaccinia virus uracil-DNA glycosylase reveals dimeric assembly
Source: Springer Nature journal article supplement (doi:10.1186/1472-6807-7-45), 2007-07-02
Supplement: Additional file 1 [file 1472-6807-7-45-s1.pdf]

**Table. List of major interactions of all ligands in vvUDG.**

**2OWQ**

| <b>Ligand</b> | <b>Atom</b> | <b>Residue</b> | <b>Atom</b> | <b>Distance (Å)</b> |
|---------------|-------------|----------------|-------------|---------------------|
| GOL301 X      | O3          | Asp68 B        | O           | 3.37                |
| GOL301 X      | O3          | Wat146         | O           | 2.83                |
| GOL301 X      | O1          | N120 B         | ND2         | 3.21                |
| GOL301 X      | O1          | Wat132         | O           | 2.62                |
| GOL301 X      | O1          | N120 B         | OD1         | 2.86                |
| GOL301 X      | O1          | F79 B          | N           | 2.91                |
| GOL302 X      | O2          | T12 B          | O           | 3.41                |
| GOL302 X      | O2          | T14 B          | N           | 3.14                |
| GOL302 X      | O2          | T14 B          | OG1         | 3.05                |
| GOL302 X      | O1          | T14 B          | N           | 3.33                |
| GOL302 X      | O1          | T14 B          | O           | 2.43                |
| GOL302 X      | O1          | F50 B          | O           | 2.82                |
| GOL303 X      | O2          | H181 B         | N           | 3.47                |
| GOL303 X      | O1          | K160 B         | N           | 2.83                |
| GOL304 X      | O1          | Wat111         | O           | 3.54                |
| C1201 X       | CL          | Wat143         | O           | 3.43                |
| C1201 X       | CL          | N120 A         | ND2         | 3.26                |
| C1201 X       | CL          | Y70 A          | N           | 3.47                |
| C1201 X       | CL          | F79 A          | N           | 3.35                |

**2OWR**

| <b>Ligand</b> | <b>Atom</b> | <b>Residue</b> | <b>Atom</b> | <b>Distance (Å)</b> |
|---------------|-------------|----------------|-------------|---------------------|
| SO4202 X      | O1          | Wat144         | O           | 2.66                |
| SO4202 X      | O2          | Wat145         | O           | 3.22                |
| SO4202 X      | O3          | Wat37          | O           | 2.83                |
| SO4202 X      | O4          | Wat54          | O           | 3.06                |
| IMD401 X      | N1          | D68 A          | O           | 3.28                |
| IMD402 X      | N3          | H8 B           | O           | 2.63                |
| IMD403 X      | N3          | H8 A           | O           | 3.39                |
| IMD403 X      | N1          | N31 A          | O           | 3.85                |
| IMD403 X      | N1          | Wat123         | O           | 3.70                |
| GOL603        | O2          | Y218 A         | N           | 3.10                |
| GOL603        | O3          | F216 A         | O           | 3.02                |
| GOL604        | O1          | I135 A         | N           | 3.04                |
| GOL604        | O1          | S132 A         | O           | 2.44                |
| GOL604        | O1          | A134 A         | N           | 2.89                |

|        |    |        |     |      |
|--------|----|--------|-----|------|
| GOL604 | 02 | D138 C | OD2 | 3.23 |
| GOL604 | 01 | I135 C | O   | 2.47 |
| GOL604 | 03 | K131 A | O   | 2.54 |
| GOL605 | 01 | Y70 A  | N   | 2.99 |
| GOL605 | 02 | F79 A  | N   | 2.77 |
| GOL605 | 02 | N120 A | OD1 | 2.33 |
| GOL605 | 02 | N120 A | ND2 | 3.05 |
| GOL606 | 01 | F49 A  | O   | 2.68 |
| GOL606 | 01 | Q52 A  | N   | 3.27 |
| GOL606 | 01 | G76 A  | O   | 2.58 |
| GOL606 | 02 | G76 A  | O   | 2.56 |
| GOL606 | 03 | N120 A | O   | 2.57 |
| GOL606 | 03 | N120 A | N   | 3.04 |
| GOL607 | 01 | E129 A | OE1 | 2.84 |
| GOL607 | 02 | T130 A | O   | 2.28 |
| GOL607 | 02 | T130 A | N   | 3.11 |
| GOL607 | 03 | Wat488 | O   | 2.69 |
| GOL608 | 01 | Y122 A | OH  | 2.63 |
| GOL608 | 02 | D162 A | O   | 2.53 |
| GOL608 | 03 | K131 A | NZ  | 2.89 |
| GOL609 | 03 | S164 A | N   | 3.30 |
| GOL609 | 03 | N165 A | N   | 2.75 |
| GOL609 | 03 | I166 A | N   | 2.73 |
| GOL609 | 03 | D162 A | O   | 3.19 |
| GOL610 | 02 | K191 A | O   | 2.96 |
| GOL610 | 03 | K191 A | O   | 3.31 |
| GOL611 | 01 | N165 C | ND2 | 3.24 |
| GOL611 | 01 | E32 A  | OE2 | 3.13 |
| GOL611 | 02 | Wat376 | O   | 2.89 |
| GOL611 | 02 | K139 A | N   | 3.12 |
| GOL611 | 03 | K139 A | N   | 3.27 |
| GOL611 | 03 | Y136 A | O   | 2.42 |
| GOL611 | 03 | W137 A | O   | 3.14 |
| GOL612 | 01 | N120 C | ND2 | 2.85 |
| GOL612 | 03 | Q52 C  | N   | 2.89 |
| GOL612 | 03 | F49 C  | O   | 3.05 |
| GOL612 | 03 | I51 C  | N   | 3.25 |
| GOL612 | 03 | G76 C  | O   | 2.71 |
| GOL612 | 03 | T14 C  | O   | 2.83 |
| GOL612 | 03 | F50 C  | O   | 3.07 |
| GOL613 | 02 | T14 C  | N   | 3.14 |
| GOL613 | 03 | T12 C  | O   | 2.67 |
| GOL613 | 03 | Wat52  | O   | 3.30 |

|        |     |        |     |      |
|--------|-----|--------|-----|------|
| GOL614 | O1  | Wat524 | O   | 2.89 |
| GOL614 | O2  | E20 C  | O   | 2.93 |
| GOL614 | O2  | S24 C  | N   | 3.02 |
| GOL614 | O3  | P21 C  | O   | 2.71 |
| GOL614 | O3  | Q25 C  | NE2 | 2.93 |
| GOL615 | O1  | P46 D  | O   | 2.96 |
| GOL615 | O1  | F50 D  | N   | 2.98 |
| GOL615 | O2  | T12 D  | O   | 2.71 |
| GOL615 | O3  | T14 D  | N   | 3.00 |
| GOL616 | O1  | Y70 E  | N   | 3.07 |
| GOL616 | O1  | Wat166 | O   | 3.03 |
| GOL616 | O2  | N120 E | OD1 | 2.38 |
| GOL616 | O2  | N120 E | ND2 | 2.99 |
| GOL616 | O2  | F79 E  | N   | 2.65 |
| GOL617 | O1  | N120 E | N   | 3.17 |
| GOL617 | O1  | N120 E | O   | 2.86 |
| GOL617 | O2  | G76 E  | O   | 3.33 |
| GOL617 | O3  | N120 E | ND2 | 2.97 |
| GOL617 | O3  | Wat111 | O   | 2.31 |
| GOL618 | O1  | Q146 E | OE1 | 3.26 |
| GOL618 | O2  | L143 E | O   | 2.57 |
| GOL618 | O2  | H147 E | N   | 3.06 |
| GOL618 | O3  | H147 E | ND1 | 2.70 |
| GOL618 | O3  | K150 E | NZ  | 3.25 |
| GOL619 | O1  | N120 G | OD1 | 2.69 |
| GOL619 | O1  | N120 G | ND2 | 2.84 |
| GOL619 | O3  | D68 G  | O   | 2.62 |
| GOL619 | O3  | N120 G | OD1 | 3.01 |
| GOL620 | O1  | Wat416 | O   | 3.04 |
| GOL620 | O1  | G74 G  | O   | 3.00 |
| GOL620 | O2  | D73 G  | N   | 3.10 |
| CL600  | CL  | N120 C | N   | 3.13 |
| CL600  | CL  | N120 C | O   | 2.70 |
| CL600  | CL  | Gol612 | O2  | 2.46 |
| EPE601 | O1S | K160 A | N   | 3.18 |
| EPE602 | O2S | A183 E | O   | 3.39 |
| EPE602 | O3S | A184 E | N   | 3.42 |
